# Supplementary material for: Hemispheric Cortical, Cerebellar and Caudate Atrophy Associated to Cognitive Impairment in Metropolitan Mexico City Young Adults Exposed to Fine Particulate Matter Air Pollution
Source: MDPI journal article supplement (doi:10.3390/toxics10040156), 2022-03-25
Supplement: s1 [file s1]

# Supplementary Materials: Hemispheric Cortical, Cerebellar and Caudate Atrophy Associated to Cognitive Impairment in Metropolitan Mexico City Young Adults Exposed to Fine Particulate Matter Air Pollution

Lilian Calderón-Garcidueñas, Jacqueline Hernández-Luna, Partha S. Mukherjee, Martin Styner, Diana A. Chávez-Franco, Samuel C. Luévano-Castro, Celia Nohemí Crespo-Cortés, Elijah W. Stommel and Ricardo Torres-Jardón

**Table S1.** Summary of MoCA cognition scores in subjects  $\geq 31$ y and  $\leq 30$ y in Metropolitan Mexico City MRI and non-MRI subjects and Control City Hermosillo. Adjusted p-value refers to the p-values after removing the linear effects of age, gender, BMI, and education years.

| Residency                                                        | MoCA<br>Total<br>score<br>Expected:<br>26-30 | Trail<br>Expected:<br>1 | Cube<br>Expected:<br>1 | Clock<br>Expected:<br>3 | ID<br>animals<br>Expected:<br>3 | Memory<br>Expected:<br>5 | Attent 1<br>Expected:<br>2 | Attent 2<br>Expected:<br>1 | Attent 3<br>Expected:<br>3 | Lang 1<br>Expected:<br>2 | Lang 2<br>Expected:<br>1 | Abstrac<br>Expected:<br>2 | Orient<br>6   |
|------------------------------------------------------------------|----------------------------------------------|-------------------------|------------------------|-------------------------|---------------------------------|--------------------------|----------------------------|----------------------------|----------------------------|--------------------------|--------------------------|---------------------------|---------------|
| All MMC<br>$\geq 31$ n:83                                        | 20.49±<br>3.42                               | 0.79±<br>0.41           | 0.15±<br>0.36          | 1.90±<br>0.94           | 2.40±1.15                       | 1.48±<br>1.45            | 1.38±<br>0.66              | 0.71±<br>0.45              | 2.10±<br>0.94              | 1.13±<br>0.77            | 0.82±0.44                | 1.58±<br>0.68             | 5.77±<br>0.45 |
| MRI MMC<br>$\geq 31$ n:14                                        | 23.36±2.84                                   | 0.93±0.27               | 0.43±0.51              | 2.5±0.76                | 2.79±0.80                       | <b>2.07±1.44</b>         | 1.64±0.63                  | 0.71±0.47                  | 2.36±0.93                  | 1.50±0.52                | 0.93±0.27                | 1.79±0.58                 | 5.79±0.43     |
| HERMOSIL<br>LO<br>$\geq 31$ y n:13                               | 25.23±2.39                                   | 0.92±0.28               | 0.15±0.38              | 2.00±0.91               | 2.92±0.28                       | 3.31±1.75                | 2.00±0.00                  | 0.92±0.28                  | 2.46±0.78                  | 1.92±0.28                | 0.92±0.28                | 1.69±0.48                 | 5.92±0.28     |
| Adjusted p<br>value<br>between<br>NON MRI<br>MMC and<br>controls | <b>&lt; 0.0001</b>                           | 0.43                    | 0.53                   | 0.90                    | 0.22                            | <b>0.0004</b>            | <b>0.0090</b>              | <b>0.0466</b>              | 0.49                       | <b>0.0024</b>            | 0.65                     | 0.62                      | 0.25          |
| Adjusted p<br>value<br>between<br>MRI MMC<br>and<br>controls     | <b>0.06</b>                                  | 0.80                    | 0.25                   | 0.25                    | 0.62                            | 0.08                     | 0.07                       | 0.08                       | 0.92                       | <b>0.03</b>              | 0.99                     | 0.94                      | 0.33          |
| MMC $\leq 30$ y<br>n:150                                         | 24.27±2.62                                   | 0.93±0.26               | 0.57±0.50              | 2.28±0.86               | 2.97±0.27                       | 2.74±1.42                | 1.69±0.48                  | 0.94±0.24                  | 2.43±0.84                  | 1.34±0.64                | 0.86±0.37                | 1.64±0.61                 | 5.81±0.44     |
| MRI MMC<br>$\leq 30$ y<br>n:20                                   | 24.50±2.63                                   | 0.95±0.22               | 0.65±0.49              | 2.45±0.76               | 3.00±0.00                       | 2.55±1.28                | 1.65±0.49                  | 0.95±0.22                  | 2.35±0.93                  | 1.45±0.60                | 0.85±0.37                | 1.75±0.55                 | 5.75±0.44     |
| HERMOSIL<br>LO<br>$\leq 30$ y<br>n:22                            | 24.73±2.19                                   | 0.95±0.21               | 0.23±0.43              | 2.14±0.71               | 3.00±0.00                       | 3.14±1.39                | 1.68±0.65                  | 0.95±0.21                  | 2.59±0.85                  | 1.27±0.55                | 1.00±0.00                | 1.86±0.35                 | 5.95±0.21     |
| Adjusted p<br>value<br>between<br>NON MRI<br>MMC and<br>controls | 0.40                                         | 0.82                    | <b>0.0002</b>          | 0.37                    | 0.33                            | 0.07                     | 0.99                       | 0.43                       | 0.44                       | 0.70                     | <b>0.0414</b>            | 0.34                      | <b>0.17</b>   |
| Adjusted p<br>value<br>between<br>MRI MMC                        | 0.40                                         | 0.88                    | <b>0.0009</b>          | 0.72                    | 0.62                            | 0.09                     | 0.70                       | 0.42                       | 0.20                       | 0.34                     | <b>0.08</b>              | 0.20                      | <b>0.03</b>   |

and  
controls

**Table S2.** Summary of MoCA scores, Cognitive Domain Scores, age, BMI and education years in MMC (MRI and NON-MRI) and Control City Hermosillo  $\leq 30$ y and  $\geq 31$ years. Adjusted p-value refers to the p-values after removing the linear effects of age, gender, BMI, and education years.

| Residency                           | MoCA scores      | Average age years | BMI            | Education years | Memory        | EIS Total:13 Cutoff score 10.5 | LIS Total:6 Cutoff score 5.5 | VIS Total:7 Cutoff score 5.5 | AIS Total:18 Cutoff score 16 | OIS Total:6 Cutoff score 5.5 | Delay recall+EIS +VIS+LIS Total:31 Cutoff score 24 |
|-------------------------------------|------------------|-------------------|----------------|-----------------|---------------|--------------------------------|------------------------------|------------------------------|------------------------------|------------------------------|----------------------------------------------------|
| MMC $\geq 31$ y<br>N:83             | 20.49 $\pm$ 3.42 | 46.4 $\pm$ 11.8   | 27.8 $\pm$ 3.9 | 13.2 $\pm$ 3.3  | 1.4 $\pm$ 1.4 | 9.2 $\pm$ 2.2                  | 4.3 $\pm$ 1.5                | 4.4 $\pm$ 1.71               | 15.3 $\pm$ 1.7               | 5.7 $\pm$ 0.4                | 19.5 $\pm$ 4.8                                     |
| MRI MMC $\geq 31$ y n:14            | 23.36 $\pm$ 2.84 | 42.7 $\pm$ 9.3    | 28.1 $\pm$ 4.3 | 16.0 $\pm$ 2.1  | 2.0 $\pm$ 1.4 | 10.8 $\pm$ 1.4                 | 5.21 $\pm$ 1.05              | 5.71 $\pm$ 1.38              | 17.1 $\pm$ 1.2               | 5.7 $\pm$ 0.4                | 23.8 $\pm$ 3.8                                     |
| Hermosillo $\geq 31$ y<br>n:13      | 25.23 $\pm$ 2.39 | 44.0 $\pm$ 7.2    | 26.9 $\pm$ 4.3 | 15.2 $\pm$ 2.8  | 3.3 $\pm$ 1.7 | 10.9 $\pm$ 1.3                 | 5.7 $\pm$ 0.4                | 5.0 $\pm$ 1.1                | 17.3 $\pm$ 1.0               | 5.9 $\pm$ 0.2                | 25.0 $\pm$ 3.1                                     |
| Adjusted p value NON-MRI MMC vs HER | <0.0001          | NA                | NA             | NA              | 0.0004        | 0.08                           | 0.0078                       | 0.44                         | 0.0010                       | 0.25                         | 0.0005                                             |
| Adjusted p value MRI MMC vs HER     | 0.06             | NA                | NA             | NA              | 0.08          | 0.62                           | 0.13                         | 0.34                         | 0.04                         | 0.33                         | 0.29                                               |
| MMC $\leq 30$ y<br>n:150            | 24.2 $\pm$ 2.6   | 21.6 $\pm$ 3.5    | 24.2 $\pm$ 3.2 | 13.6 $\pm$ 1.7  | 2.7 $\pm$ 1.4 | 10.7 $\pm$ 1.6                 | 5.1 $\pm$ 0.8                | 5.8 $\pm$ 1.1                | 16.4 $\pm$ 1.2               | 5.8 $\pm$ 0.4                | 24.5 $\pm$ 3.2                                     |
| MRI MMC $\leq 30$ y<br>n:20         | 24.5 $\pm$ 2.6   | 22.0 $\pm$ 3.3    | 23.8 $\pm$ 3.8 | 14.1 $\pm$ 1.6  | 2.5 $\pm$ 1.3 | 10.9 $\pm$ 1.8                 | 5.3 $\pm$ 0.7                | 6.1 $\pm$ 0.9                | 17.2 $\pm$ 1.7               | 5.7 $\pm$ 0.4                | 24.9 $\pm$ 2.9                                     |
| Hermosillo $\leq 30$ y<br>n:22      | 24.7 $\pm$ 2.2   | 19.3 $\pm$ 1.3    | 21.9 $\pm$ 2.7 | 13.7 $\pm$ 0.7  | 3.1 $\pm$ 1.4 | 11.1 $\pm$ 1.2                 | 5.2 $\pm$ 0.5                | 5.3 $\pm$ 0.90               | 17.5 $\pm$ 1.2               | 5.9 $\pm$ 0.2                | 24.9 $\pm$ 2.5                                     |
| Adjusted p value NON-MRI MMC vs HER | 0.40             | NA                | NA             | NA              | 0.07          | 0.40                           | 0.43                         | 0.03                         | 0.65                         | 0.17                         | 0.48                                               |
| Adjusted p value MRI MMC vs HER     | 0.40             | NA                | NA             | NA              | 0.09          | 0.64                           | 0.86                         | 0.06                         | 0.50                         | 0.03                         | 0.73                                               |

Executive Index Score (EIS) is the sum of Trail making, clock drawing, digit span forward and backward, letter A tapping, serial 7's subtraction, word fluency and abstraction.

Language Index Scores (LIS): animal naming, sentence repetition and word fluency.

Visuospatial Index Score (VIS): cube copy, clock drawing and animal naming.

Attention Index Score (AIS): digit span forward and backward, letter A tapping, serial 7s subtraction, sentence repetition and Words Recalled in Both Immediate Recall Trials.

The Orientation Index Score (OIS) includes all the Orientation items (0–6 points).

Summary Score: Delayed Recall Score plus VIS, EIS, and LIS.
